# Supplementary material
Source: publisher figshare collection journal article supplement (https://acs.figshare.com/ndownloader/files/3887956)
Supplement: Supplementary file 1 [file 3887956]

# Kinetics Study of the Esterification Reaction of Diethylene Glycol Monobutyl Ether with Acetic Acid Catalyzed by Heteropolyanion-Based Ionic Liquids

Yong Liu \*, Yitao Wang, Cuiping Zhai, Weiping Chen, Congzhen Qiao\*

Institute of Fine Chemistry and Engineering, College of Chemistry and Chemical Engineering, Henan University, Kaifeng, 475004, China

\*Corresponding Author: E-mail: liuyong79@126.com and  
qiaocongzheng@henu.edu.cn.

## Supporting Information

Six heteropolyanion-based ionic liquids (HPA-ILs) composed of  $\text{PW}_{12}\text{O}_{40}^{3-}$  anion and different cations were prepared in this work.  $^1\text{H}$  NMR (Bruker DPX-400) spectrum of these HPA-ILs were recorded. FT-IR spectra for samples in KBr disks were recorded on Thermo Nicolet 870. Thermogravimetric and differential scanning calorimetry (TG-DSC) curves were obtained on a TA Q600 thermal analyzer. Samples were heated from room temperature to 800 °C at a heating rate of 10 °C/min under flowing nitrogen. Elemental analysis (C, H, N) was performed on a CHN elemental analyzer (vario EL).

**[Mim] $_3$ PW $_{12}$ O $_{40}$ :**  $^1\text{H}$  NMR (400 MHz, DMSO)  $\delta$  9.00 (s, 1H), 7.63 (s, 1H), 7.56 (s, 1H), 3.92 (s, 3H).

**[Et $_3$ NH] $_3$ PW $_{12}$ O $_{40}$ :**  $^1\text{H}$  NMR (400 MHz, DMSO)  $\delta$  8.86 (s, 2H), 3.19-3.03 (m, 6H), 1.19 (t,  $J$  = 7.3 Hz, 9H).

**[Bmim]<sub>3</sub>PW<sub>12</sub>O<sub>40</sub>:** <sup>1</sup>H NMR (400 MHz, DMSO) δ 9.10 (s, 1H), 7.75 (dd, *J* = 14.6, 13.0 Hz, 2H), 4.17 (t, *J* = 7.2 Hz, 2H), 3.86 (s, 3H), 1.83 – 1.72 (m, 2H), 1.26 (dt, *J* = 14.7, 7.4 Hz, 2H), 0.91 (t, *J* = 7.4 Hz, 3H).

**[N<sub>2224</sub>]<sub>3</sub>PW<sub>12</sub>O<sub>40</sub>:** <sup>1</sup>H NMR (400 MHz, DMSO) δ 3.24 (q, *J* = 7.2 Hz, 6H), 3.15-3.08 (m, 2H), 1.57 (dt, *J* = 15.9, 7.8 Hz, 2H), 1.34 (dd, *J* = 14.8, 7.4 Hz, 2H), 1.18 (ddd, *J* = 7.2, 5.6, 1.6 Hz, 9H), 0.95 (t, *J* = 7.3 Hz, 3H).

**[BSmim]<sub>3</sub>PW<sub>12</sub>O<sub>40</sub>:** <sup>1</sup>H NMR (400 MHz, DMSO) δ 9.13 (s, 2H), 7.74 (dt, *J* = 27.0, 1.7 Hz, 2H), 4.19 (t, *J* = 7.0 Hz, 2H), 3.86 (s, 3H), 2.54-2.43 (m, 2H), 1.95 – 1.79 (m, 2H), 1.54 (d, *J* = 7.3 Hz, 2H).

**[BSEt<sub>3</sub>N]<sub>3</sub>PW<sub>12</sub>O<sub>40</sub>:** <sup>1</sup>H NMR (400 MHz, DMSO) δ 3.37 (t, *J* = 6.4 Hz, 2H), 3.21 (q, *J* = 7.2 Hz, 6H), 2.54 (d, *J* = 7.6 Hz, 2H), 1.61 (dd, *J* = 8.6, 5.0 Hz, 2H), 1.46 (dt, *J* = 13.7, 6.7 Hz, 2H), 1.23-1.06 (m, 9H).

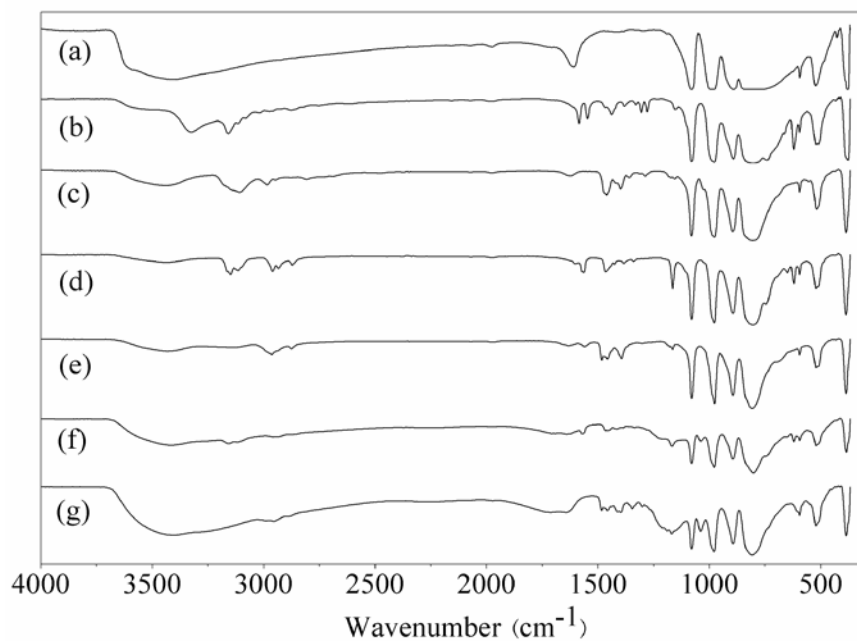

**Fig. S1.** FT-IR spectra of (a)  $\text{H}_3\text{PW}_{12}\text{O}_{40}$ , (b)  $[\text{Mim}]_3\text{PW}_{12}\text{O}_{40}$ , (c)  $[\text{Et}_3\text{NH}]_3\text{PW}_{12}\text{O}_{40}$ ,  
 (d)  $[\text{Bmim}]_3\text{PW}_{12}\text{O}_{40}$ , (e)  $[\text{N}_{2224}]_3\text{PW}_{12}\text{O}_{40}$ , (f)  $[\text{BSmim}]_3\text{PW}_{12}\text{O}_{40}$ , (g)  
 $[\text{BSEt}_3\text{N}]_3\text{PW}_{12}\text{O}_{40}$ .

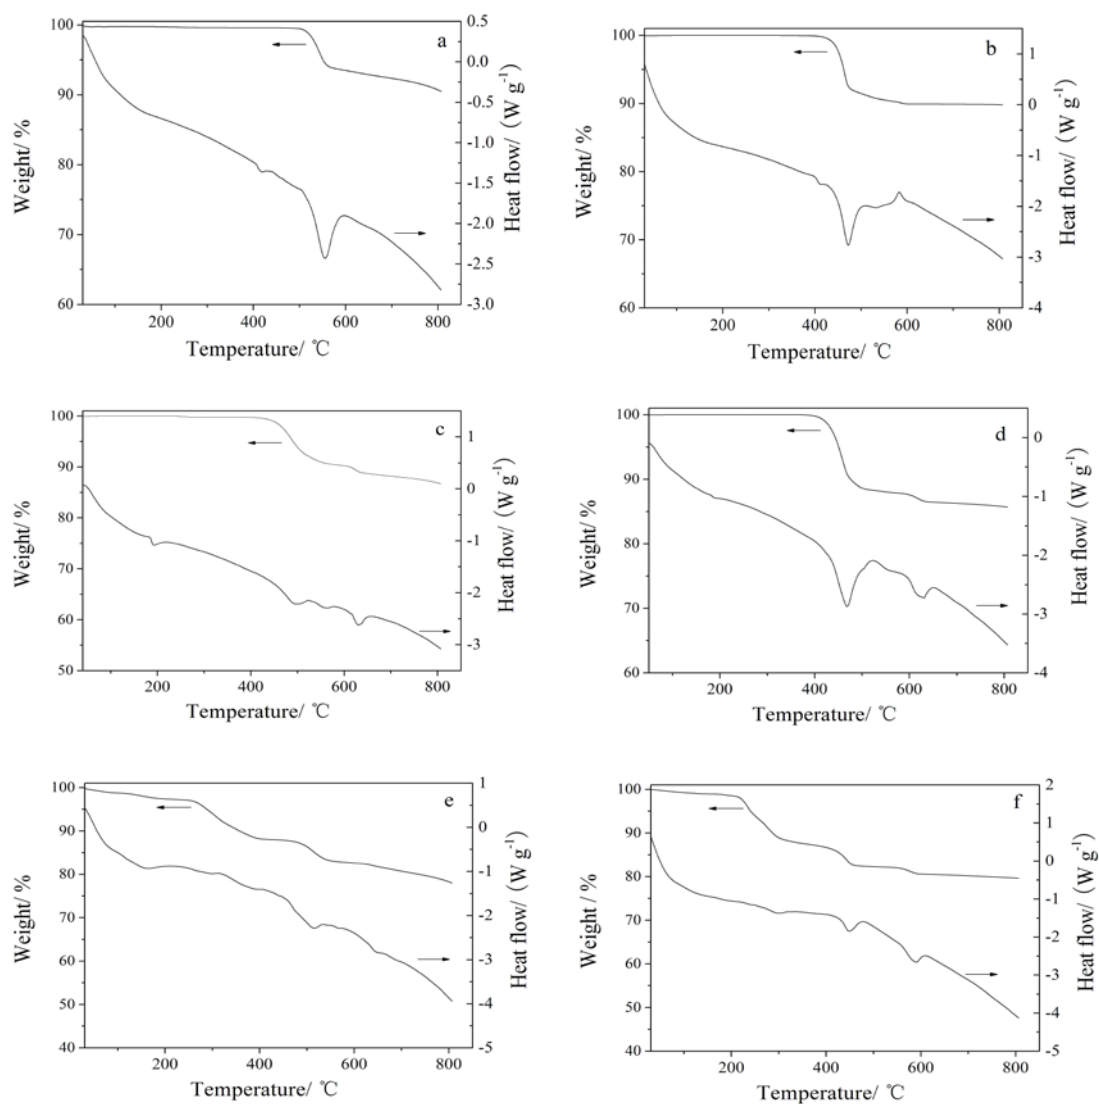

**Figure S2.** TG-DSC curves of (a)  $[\text{Mim}]_3\text{PW}_{12}\text{O}_{40}$ , (b)  $[\text{Et}_3\text{NH}]_3\text{PW}_{12}\text{O}_{40}$ , (c)  $[\text{Bmim}]_3\text{PW}_{12}\text{O}_{40}$ , (d)  $[\text{N}_{2224}]_3\text{PW}_{12}\text{O}_{40}$ , (e)  $[\text{BSmim}]_3\text{PW}_{12}\text{O}_{40}$ , (f)  $[\text{BSEt}_3\text{N}]_3\text{PW}_{12}\text{O}_{40}$

**Table S1.** Elemental analysis (C, H, N) of catalysts

| Catalyst                                                            | Element | Measured value, % | Calculated value, % |
|---------------------------------------------------------------------|---------|-------------------|---------------------|
| [Mim] <sub>3</sub> PW <sub>12</sub> O <sub>40</sub>                 | C       | 4.27              | 4.60                |
|                                                                     | H       | 0.60              | 0.67                |
|                                                                     | N       | 2.43              | 2.69                |
| [Et <sub>3</sub> NH] <sub>3</sub> PW <sub>12</sub> O <sub>40</sub>  | C       | 7.12              | 6.78                |
|                                                                     | H       | 1.36              | 1.51                |
|                                                                     | N       | 1.19              | 1.32                |
| [Bmim] <sub>3</sub> PW <sub>12</sub> O <sub>40</sub>                | C       | 9.08              | 8.74                |
|                                                                     | H       | 1.45              | 1.37                |
|                                                                     | N       | 2.68              | 2.55                |
| [N <sub>2224</sub> ] <sub>3</sub> PW <sub>12</sub> O <sub>40</sub>  | C       | 11.08             | 10.74               |
|                                                                     | H       | 2.41              | 2.15                |
|                                                                     | N       | 1.41              | 1.25                |
| [BSmim] <sub>3</sub> PW <sub>12</sub> O <sub>40</sub>               | C       | 8.45              | 8.14                |
|                                                                     | H       | 1.36              | 1.28                |
|                                                                     | N       | 2.52              | 2.38                |
| [BSEt <sub>3</sub> N] <sub>3</sub> PW <sub>12</sub> O <sub>40</sub> | C       | 9.66              | 10.02               |
|                                                                     | H       | 1.85              | 2.00                |
|                                                                     | N       | 1.07              | 1.17                |
